# Supplementary material for: Functional Analysis of 3-Dehydroquinate Dehydratase/Shikimate Dehydrogenases Involved in Shikimate Pathway in Camellia sinensis
Source: PubMed Central journal article supplement (PMC6797610; doi:10.3389/fpls.2019.01268), 2019-10-11
Supplement: DataSheet_1.pdf [file DataSheet_1.pdf]

## Supplementary Data

**Supplementary Figure 1** Sequence consistency analysis of 30 DQD/SDH proteins from plants.

**Supplementary Figure 2** Comparison of the partial DQD/SDH sequences from the tea plant and other species (*Arabidopsis* and *Vitis vinifera*) using DNAMAN 6.0. A. DQD unit; B. SDH unit. Amino acid numeration is based on the protein sequence of *A. thaliana*. The key amino acids are marked with red dots; the G-motif with a green box; and the NRT motif with a blue box. Conserved amino acids are marked with black (similarity = 100%), dark gray (similarity  $\geq$  75%), and light gray (similarity  $\geq$  50%) colors.

**Supplementary Figure 3** HPLC analysis of recombinant *Cs*DQD/SDHa enzyme reaction products. (A) HPLC chromatograms from top to bottom are for the standard of SA (top), boiled enzyme reaction with 3-DHS and NADPH (middle), and enzyme production of SA (bottom); (B) HPLC chromatograms from top to bottom are for the standard of 3-DHS (top), boiled enzyme reaction with SA and NADP<sup>+</sup> (middle), and enzyme production of 3-DHS (bottom); (C) MS/MS molecular ion characteristics of the enzyme products of 3-DHS (171.0) and SA (173.0).

**Supplementary Figure 4** Selection of the optimum pH value for the *Cs*DQD/SDHs reaction. A, B, and C showed the production accumulation profile at various pH values from *Cs*DQD/SDHa, *Cs*DQD/SDHc, and *Cs*DQD/SDHd, respectively. The top line shows the 3-DHS reduction reaction, the bottom line shows the SA oxidation reaction. ▲: represents the citric acid buffer; ●: represents the BTP-HCl buffer; ■: represents the sodium carbonate buffer.

**Supplementary Table S1** The primer sequences used in this study.

**Supplementary Table S2** ID of multiple plant DQD/SDH proteins used in this study.

| Purpose            | Name                      | 5'-3' sequence                      | Restriction site |
|--------------------|---------------------------|-------------------------------------|------------------|
| Protein expression | <i>Cs</i> DQD/SDHa-pMAL-F | <u>GGATCC</u> ATGGAGTTGGTTGCACCT    | BamHI            |
|                    | <i>Cs</i> DQD/SDHa-pMAL-R | <u>CTGCAGT</u> CAATATTTTGCCATGAT    | PstI             |
|                    | <i>Cs</i> DQD/SDHb-pMAL-F | <u>GGATCC</u> ATGGGTAGTGTGGGGTG     | BamHI            |
|                    | <i>Cs</i> DQD/SDHb-pMAL-R | <u>CTGCAGT</u> CAGAAGTTTGCGAAAAT    | PstI             |
|                    | <i>Cs</i> DQD/SDHc-pMAL-F | <u>GGATCC</u> ATGGCCTCTGGAAGCTTTTCG | BamHI            |
|                    | <i>Cs</i> DQD/SDHc-pMAL-R | <u>CTGCAGT</u> TATGCGTGTCTTGACATG   | PstI             |

---

|                  |                         |                                        |       |
|------------------|-------------------------|----------------------------------------|-------|
|                  | CsDQD/SDHd-pMAL-F       | <u>GGATCC</u> ATGACTCTCAGCAGCAT        | BamHI |
|                  | CsDQD/SDHd-pMAL-R       | <u>CTGCAGT</u> TATGTGTTCTTTGCTA        | PstI  |
| qPCR             | CsDQD/SDHa-F            | ACAACCGCCTTGGACATCAC                   |       |
|                  | CsDQD/SDHa-R            | CCATCAAACCCCTTTCACCC                   |       |
|                  | CsDQD/SDHb-F            | ATCACTCCCATCTCCGCTCAC                  |       |
|                  | CsDQD/SDHb-R            | GACAACCCTCGCTCCTCTG                    |       |
|                  | CsDQD/SDHc-F            | GTAGTAGCGGAGTTAGGAGCG                  |       |
|                  | CsDQD/SDHc-R            | GAAGATCAGGGCGTGGATTG                   |       |
|                  | CsDQD/SDHd-F            | GACAGGCTGCATTGCGTCAG                   |       |
|                  | CsDQD/SDHd-R            | GGCCCCTTTCACCCATAACA                   |       |
|                  | GAPDH-F                 | TTGGCATCGTTGAGGGTCT                    |       |
|                  | GAPDH-R                 | CAGTGGGAACACGGAAAGC                    |       |
| MTCsDQ<br>D/SDHb | CsDQD/SDHb-338G→S<br>-F | GTGGGCCACAGCAAAAGTCCCCTTCTC<br>CATAAT  |       |
|                  | CsDQD/SDHb-338G→S<br>-R | ATTATGGAGAAGGGGACTTTTGCTGTG<br>GCCCCAC |       |
|                  | CsDQD/SDHb-381G→T-<br>F | GCAGGTTTCAGTGTAACATTTCCATACA<br>AGGAA  |       |
|                  | CsDQD/SDHb-381G→T-<br>R | TTCCTTGATGGAAATGTTACTGAAA<br>CCTGC     |       |
|                  | CsDQD/SDHb-483D→N<br>-F | AGGGTTGTCATTTTTAACATTGATTTTG<br>ACAGA  |       |
|                  | CsDQD/SDHb-483D→N<br>-R | TCTGTCAAATCAATGTAAAAATGACA<br>ACCCT    |       |
|                  | CsDQD/SDHb-484I→R-<br>F | GTTGTCATTTTGACCGTGATTTTGACA<br>GAGCA   |       |
|                  | CsDQD/SDHb-484I→R-<br>R | TGCTCTGTCAAATCACGGTCAAAT               |       |

---

---

|        |                         |                                       |
|--------|-------------------------|---------------------------------------|
|        | R                       | GACAAC                                |
|        | CsDQD/SDHb-485D→T-<br>F | GTCATTTTTGACATTACTTTTGACAGAG<br>CAAAG |
|        | CsDQD/SDHb-485D→T-<br>R | CTTTGCTCTGTCAAAAGTAATGTCAAA<br>AATGAC |
| CsDQDa | CsDQDa-F                | <u>GGATCCAAGAACTCAACCCTAATTTGT</u>    |
|        | CsDQDa-R                | <u>CTGCAGGATATTGTACAAGTTCACCAA</u>    |
| CsSDHa | CsSDHa-F                | <u>GGATCCATTATCGGGAAGCCTGTTGGCC</u>   |
|        | CsSDHa-R                | <u>CTGCAGTCCAGTGAACCTCTCGAATTG</u>    |

---

| Species                     | Designation | Accession number |
|-----------------------------|-------------|------------------|
| <i>Arabidopsis thaliana</i> | AtSDH       | AAF08579         |
| <i>Vitis vinifera</i>       | VvSDH1      | KU163040         |
|                             | VvSDH2      | KU163041         |
|                             | VvSDH3      | KU163042         |
|                             | VvSDH4      | KU163043         |
| <i>Nicotiana tabacum</i>    | NtSDH1      | AAS90325         |
|                             | NtSDH2      | AAS90324         |
| <i>Solanum lycopersicum</i> | SISDH1      | AAC17991         |
|                             | SISDH2      | XP_010327280     |
|                             | SISDH3      | XP_004242317     |
| <i>Diospyros kaki</i>       | DkSDH       | BAI40147         |
| <i>Eucalyptus grandis</i>   | EgSDH1      | HO1214.1         |
|                             | EgSDH2      | HO4428.1         |

---

---

|                                    |           |              |
|------------------------------------|-----------|--------------|
|                                    | EgSDH3    | HO4427.1     |
|                                    | EgSDH4    | BO1770.2     |
|                                    | EgSDH5    | J00263.6     |
| <i>Fragaria vesca</i> subsp. vesca | FvSDH1    | XP_004302480 |
|                                    | FvSDH2    | XP_004302479 |
|                                    | FvSDH3    | XP_004289250 |
|                                    | FvSDH4    | XP_004288087 |
| <i>Populus trichocarpa</i>         | PoptrSDH1 | 010G019000   |
|                                    | PoptrSDH2 | 013G029900   |
|                                    | PoptrSDH3 | 005G043400   |
|                                    | PoptrSDH4 | 014G135500   |
|                                    | PoptrSDH5 | 013G029800   |
| <i>Juglans regia</i>               | JrSDH     | AAW65140     |

---
